# Supplementary material for: Genome-Wide Analysis of the DYW Subgroup PPR Gene Family and Identification of GmPPR4 Responses to Drought Stress
Source: MDPI journal article supplement (doi:10.3390/ijms20225667), 2019-11-12
Supplement: s1 [file s1]

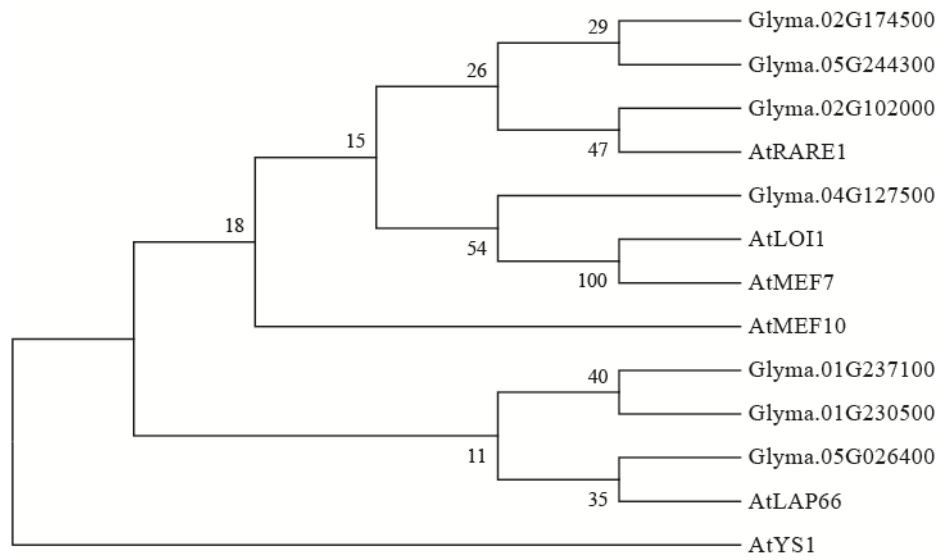

**Figure S1.** The phylogenetic tree of 12 selected proteins.

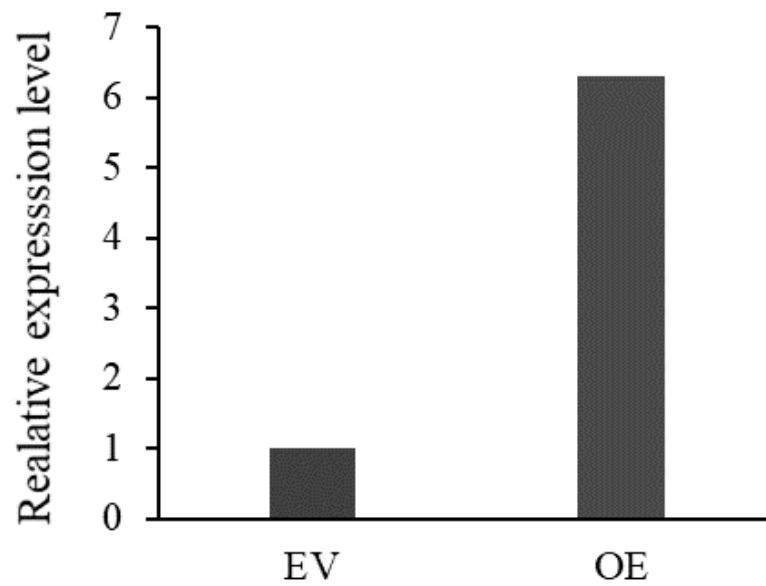

**Figure S2.** qRT-PCR analysis of *GmPPR4* expression in *GmPPR4*-OE and EV-control transgenic hairy roots.

**Table S4.** The sequences of primers used in the study.

|                                |                                 |
|--------------------------------|---------------------------------|
| <b>For gene cloning</b>        |                                 |
| PPR4F                          | ATGGGCGGTATGCTATTT              |
| PPR4R                          | AAAATACTACCCCTACAA              |
| <b>For vector construction</b> |                                 |
| PPR4-OEF                       | GGACTCTTGACCATGATGAGTGGGACATCT  |
| PPR4-OER                       | ATTCGAGCTGGTCACCCCAATAATCTTTACA |
| <b>For quantitative RT-PCR</b> |                                 |
| RT-PPR4F                       | TTCTTGGGGACATGAGCAGG            |
| RT-PPR4R                       | TCAAGGCTCCCACACTTGAC            |
| RT-PPR18F                      | ACGAGTGCCTGAGGAAAAGG            |
| RT-PPR18R                      | GTCCACGACACCACATTCCT            |
| RT-PPR111F                     | CTTGGCTTGGAATCCGAGGT            |
| RT-PPR111R                     | GCAGCTTCAAACCTTGCACA            |
| GmactinF                       | ACATTGTTCTTAGTGGTGGCT           |
| GmactinR                       | CTGTTGGAAGGTGCTGAG              |
| DREB2F                         | AGCGAAAGCAGCAGCACC              |
| DREB2R                         | GTTAAGGCGAGCGGAAGG              |
| DREB3F                         | CCGCAGTGGGAAGGTGATT             |
| DREB3R                         | CAGTAGCAGCCACCTGAGAA            |
| MYB84F                         | GGGGAAACAGGTGGTCAA              |
| MYB84R                         | TCTAGGCATCCAGAAACG              |
| bZIP1F                         | GAGGTTTGGAGGGACTTG              |
| bZIP1R                         | TTGAGGATTTGATGAGCC              |
| bzip44F                        | TCGGATGCGAAAGCGTAA              |
| bzip44R                        | TGCGTGGTGATGTCTATGGTG           |
| NAC11F                         | TCCCTCTTGTTCTATGCT              |
| NAC11R                         | GTTTCCCATTATTTGCCTA             |
| WRKY13F                        | AGGACACGGATACAGCAA              |
| WRKY13R                        | CATCTTCAGGGTAGGCAC              |
| WRKY21F                        | GATAACCGTCACTCTGCC              |
| WRKY21R                        | AGTTTCCTTTCTCCGATG              |
